# Supplementary material
Source: publisher site journal article supplement (https://www.dovepress.com/article/510240)
Supplement: Supplementary file 1 [file get_supplementary_file.php]

**Single-factor analysis of CoQ10-Lip**

(E+Q)-Lip-Apt was prepared based on CoQ10-Lip. Therefore, the first step in the formulation study of (E+Q)-Lip-Apt was to investigate the optimal formulation of CoQ10-Lip. The effects of ultrasound time, power, the molar ratio of phosphatidylcholine to cholesterol (PC: Chol), and the mass ratio of CoQ10 to lipids (CoQ10: lipids) on encapsulation efficiency (EE) of CoQ10 were Investigated through the single-factor experiment.

Table S1 Effect of ultrasonic power on the EE of CoQ10-Lip (n=3) (± s)

| Ultrasonic Power / W | EE (%) |
| --- | --- |
| 50 | 66.09±0.12 |
| 75 | 77.67±0.08 |
| 100 | 88.09±0.10 |

Table S2 Effect of ultrasonic time on the EE of CoQ10-Lip (n=3) (± s)

| Ultrasonic time/min | EE (%) |
| --- | --- |
| 5 | 55.80±0.08 |
| 10 | 77.67±0.08 |
| 15 | 68.73±0.09 |

Table S3 Effect of Phospholipid ratio on EE of CoQ10-Lip (n=3) (± s)

| PC: Chol（molar ratio） | EE (%) |
| --- | --- |
| 2：1 | 63.67±0.17 |
| 3：1 | 71.60±1.99 |
| 4：1 | 66.67±0.17 |

Table S4 Effect of CoQ10-to-Lipids ratio on the EE of CoQ10-Lip (n=3) (± s)

| CoQ10：Lipids（W/W） | EE (%) |
| --- | --- |
| 1:15 | 63.33±0.09 |
| 1：17.5 | 71.60±1.99 |
| 1：20 | 55.37±0.25 |

**Cell uptake**

Using the method of preparing (E+Q)-Lip-Apt, we prepared rhodamine B-labeled liposomes (Rhod-Lip) and centrifuged to remove free rhodamine B particles. The Rhod-Lip was added to the medium to culture for 4 h. Then the mixture was removed and cells were washed with PBS. Next, cells were fixed for 20 min and then stained for 5 min with DAPI solution. Finally, cells were observed under a confocal microscope (Leica SP8, Germany).


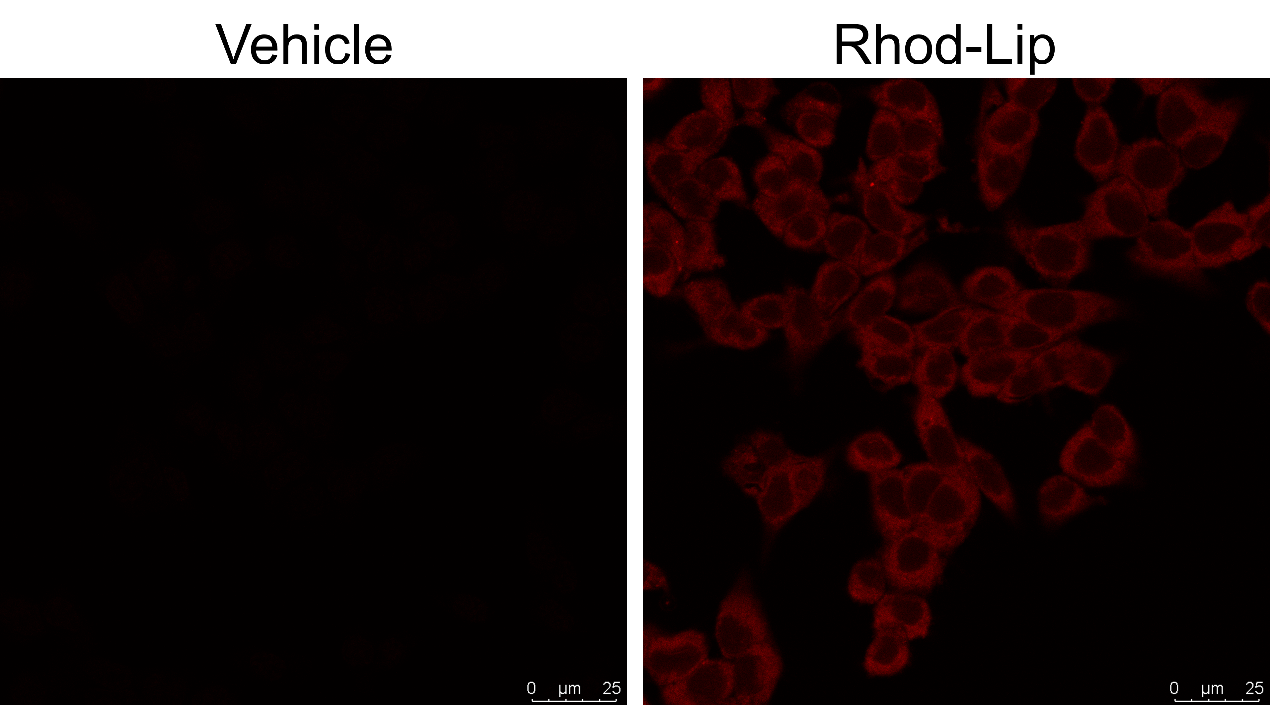


Fig S1 Cellular uptake of the rhodamine B-labeled liposomes, scale bar: 25 μm.
